# Supplementary material
Source: PubMed Central journal article supplement (PMC7964597)
Supplement: 3375_table.pdf [file 3375_table.pdf]

**On-line Table: Predictive models of ICH growth at 24 hours post-symptom onset**

| Model     | Equation                                   | 95% CI                                      | P Value                                                     | Adj. R <sup>2</sup> | Proportion of Cases Correctly Predicted ± 5 mL (%) | Proportion of Cases Correctly Predicted ± 2.5 mL (%) | Proportion of Cases Correctly Predicted ± 1 mL (%) |
|-----------|--------------------------------------------|---------------------------------------------|-------------------------------------------------------------|---------------------|----------------------------------------------------|------------------------------------------------------|----------------------------------------------------|
| BV        | 0.016BV<br>+1.069                          | 0.005–0.027                                 | .006 <sup>a</sup>                                           | 0.082               | 57/81 (70.4)                                       | 50/81 (61.7)                                         | 22/81 (27.2)                                       |
| TTS       | –0.007TTS<br>+2.234                        | –0.015–0                                    | .05 <sup>a</sup>                                            | 0.034               | 58/81 (71.6)                                       | 30/81 (37.0)                                         | 9/81 (11.1)                                        |
| BV/TTS    | 0.015BV<br>–0.007TTS<br>+1.845             | 0.005–0.026<br>–0.014–0                     | .005 <sup>a</sup><br>.05 <sup>a</sup>                       | 0.115               | 58/81 (71.6)                                       | 47/81 (58.0)                                         | 19/81 (23.5)                                       |
| M         | 0.008M<br>+1.014                           | –0.034–0.049                                | .716                                                        | –0.011              | 57/81 (70.4)                                       | 29/81 (35.8)                                         | 11/81 (13.6)                                       |
| SD        | –0.020SD<br>+2.640                         | –0.035–0.005                                | .008 <sup>a</sup>                                           | 0.074               | 51/81 (63)                                         | 36/81 (44.4)                                         | 18/81 (22.2)                                       |
| CV        | –1.549CV<br>+3.073                         | –2.497 to –0.601                            | .002 <sup>a</sup>                                           | 0.107               | 50/81 (61.7)                                       | 35/81 (43.2)                                         | 18/81 (22.2)                                       |
| S         | –0.108S<br>+1.417                          | –1.112–0.896                                | .832                                                        | –0.012              | 59/81 (72.8)                                       | 29/81 (35.8)                                         | 13/81 (16.0)                                       |
| K         | 0.737K<br>–0.192                           | 0.104–1.37                                  | .023 <sup>a</sup>                                           | 0.052               | 55/81 (67.9)                                       | 39/81 (48.1)                                         | 16/81 (19.8)                                       |
| BV/M      | 0.016BV<br>+0.006M<br>+0.736               | 0.005–0.027<br>–0.033–0.045                 | .006 <sup>a</sup><br>.765                                   | 0.071               | 56/81 (69.1)                                       | 48/81 (59.3)                                         | 22/81 (27.2)                                       |
| BV/SD     | 0.015BV<br>–0.019SD<br>+2.214              | 0.004–0.025<br>–0.033 to –0.005             | .007 <sup>a</sup><br>.01 <sup>a</sup>                       | 0.147               | 57/81 (70.4)                                       | 43/81 (53.1)                                         | 27/81 (33.3)                                       |
| BV/CV     | 0.014BV<br>–1.420CV<br>+2.607              | 0.004–0.024<br>–2.339 to –0.502             | .009 <sup>a</sup><br>.003 <sup>a</sup>                      | 0.171               | 58/81 (71.6)                                       | 42/81 (51.9)                                         | 25/81 (30.9)                                       |
| BV/S      | 0.016BV<br>+0.118S<br>+1.088               | 0.005–0.027<br>–0.857–1.093                 | .006 <sup>a</sup><br>.811                                   | 0.071               | 57/81 (70.4)                                       | 48/81 (59.3)                                         | 22/81 (27.2)                                       |
| BV/K      | 0.012BV<br>+0.415K<br>+0.228               | 0–0.025<br>–0.283–1.114                     | .049 <sup>a</sup><br>.240                                   | 0.089               | 55/81 (67.9)                                       | 45/81 (55.6)                                         | 21/81 (25.9)                                       |
| BV/TTS/M  | 0.015BV<br>–0.007TTS<br>+0.004M<br>+1.639  | 0.005–0.026<br>–0.014–0<br>–0.035–0.042     | .006 <sup>a</sup><br>.054<br>.854                           | 0.104               | 58/81 (71.6)                                       | 47/81 (58.0)                                         | 22/81 (27.2)                                       |
| BV/TTS/SD | 0.014BV<br>–0.007TTS<br>–0.019SD<br>+3.057 | 0.004–0.025<br>–0.014–0<br>–0.033 to –0.005 | .007 <sup>a</sup><br>.034 <sup>a</sup><br>.007 <sup>a</sup> | 0.185               | 59/81 (72.8)                                       | 44/81 (54.3)                                         | 25/81 (30.9)                                       |
| BV/TTS/CV | 0.014BV<br>–0.007TTS<br>–1.398CV<br>+3.3   | 0.004–0.024<br>–0.014–0<br>–2.3 to –0.5     | .009 <sup>a</sup><br>.047 <sup>a</sup><br>.003 <sup>a</sup> | 0.202               | 57/81 (70.4)                                       | 43/81 (53.1)                                         | 28/81 (34.6)                                       |
| BV/TTS/S  | 0.015BV<br>–0.007TTS<br>+0.006S<br>+1.845  | 0.004–0.026<br>–0.014–0<br>–0.959–0.971     | .006 <sup>a</sup><br>.054<br>.990                           | 0.104               | 58/81 (71.6)                                       | 47/81 (58.0)                                         | 19/81 (23.5)                                       |
| BV/TTS/K  | 0.012BV<br>–0.007TTS<br>+0.431K<br>+0.983  | 0–0.024<br>–0.014–0<br>–0.254–1.117         | .051<br>.047 <sup>a</sup><br>.214                           | 0.121               | 54/81 (66.7)                                       | 46/81 (56.8)                                         | 22/81 (27.2)                                       |

**Note:**—Adj. R<sup>2</sup> indicates adjusted R<sup>2</sup> statistic; M, mean of density distribution; SD, SD of density distribution; CI, confidence interval; CV, coefficient of variation; S, skewness; K, kurtosis.

<sup>a</sup> Statistically significant coefficients.
